# Supplementary material
Source: publisher figshare collection journal article supplement (https://sage.figshare.com/ndownloader/files/20020763)
Supplement: Supplementary file 1 [file 20020763]

# **Child Caries Management: A Randomized Controlled Trial in Dental Practice**

N.P. Innes, J.E. Clarkson, G.V.A. Douglas, V. Ryan, N. Wilson, T. Homer, Z. Marshman, E. McColl, L. Vale, M. Robertson, A. Abouhajar, R.D. Holmes, R. Freeman, B. Chadwick, C. Deery, F. Wong, and A. Maguire

## **Appendix**

### **Definition of an Episode**

Several treatment visits (i.e. a course of treatment) can be associated with the same 'episode' of dental pain and/or infection. As such we needed a definition of an 'episode' of dental pain and/or infection due to caries; to avoid multiple counting of a child's pain. The two main reasons behind this were firstly, to avoid counting the same tooth more than once when a single episode of pain was ongoing and secondly, when a child had an episode of pain, this was the same experience of pain regardless of how many teeth were involved.

This definition of an episode was operationalised on a tooth by tooth basis using Case Report Form (CRF) data, according to the following algorithm:

Let Y=presence of dental pain and/or infection at a single treatment visit (as defined above); N otherwise

Let YY= presence of dental pain and/or infection at consecutive treatment visits (i.e. on consecutive CRFs)

Y on one or more teeth at a single treatment visit = an episode

Any number of consecutive "yeses" on the same tooth regardless of timeframe = a single episode [e.g. YYYYY over 5 months]

YY on different teeth (regardless of timeframe) = two separate episodes

YNY on the same tooth = two separate episodes (regardless of timeframe)

Although episodes were defined on a tooth-by-tooth basis, for a given child if there were two (or more) teeth with dental pain and/or infection at the same visit this was recorded as one episode at that visit for that child. For example, if a particular tooth had dental pain and/or infection at two consecutive visits and at the second of the two consecutive visits a different tooth also had dental pain and/or infection this would be counted as one episode.

The trial outcome, total number of episodes, was at the child level, however, tooth level number of episodes was collected in relation to dental pain and/or infection in order to define each episode.

**Appendix Table 1: Practice characteristics; size, practice deprivation index (by quintile) and practice tap-water fluoridation status (n=72 practices that recruited at least one participant)**

| Characteristic                                          | Number of practices (% of 72) |
|---------------------------------------------------------|-------------------------------|
| <b>Region</b>                                           |                               |
| Scotland                                                | 25 (35)                       |
| Newcastle                                               | 19 (26)                       |
| Leeds/Sheffield                                         | 13 (18)                       |
| Wales                                                   | 4 (6)                         |
| London                                                  | 11 (15)                       |
| <b>Number of registered patients</b>                    |                               |
| 1 – 4999                                                | 19 (26)                       |
| 5000 – 9999                                             | 15 (21)                       |
| 10,000 – 14,999                                         | 1 (1)                         |
| 15,000+                                                 | 1 (1)                         |
| No information                                          | 36 (50)                       |
| <b>Deprivation index (quintile)</b>                     |                               |
| 1 (most deprived)                                       | 23 (32)                       |
| 2                                                       | 21 (29)                       |
| 3                                                       | 10 (14)                       |
| 4                                                       | 12 (17)                       |
| 5 (least deprived)                                      | 6 (8)                         |
| <b>Tap water fluoridation status (ppmF<sup>1</sup>)</b> |                               |
| <0.3ppmF                                                | 63 (88)                       |
| 0.3-0.7ppmF                                             | 5 (7)                         |
| >0.7ppmF                                                | 4 (6)                         |

---

<sup>1</sup> 0.7ppmF - 0.9ppmF is generally considered to be an optimal fluoride concentration for tap water in temperate climates.

**Appendix Table 2: Total resource use per child per visit** (C+P: conventional carious lesion management with best practice prevention; B+P: biological management with best practice prevention and; PA: best practice prevention alone)

| Resource Use (per visit)                                    | C+P<br>Mean (sd)          | n   | B+P<br>Mean (sd) | n   | PA<br>Mean (sd) | n   |
|-------------------------------------------------------------|---------------------------|-----|------------------|-----|-----------------|-----|
| <b>Number of visits</b>                                     |                           |     |                  |     |                 |     |
| Number of visits (all) (n=1058)                             | 7.69 (4.21)               | 352 | 7.37 (4.08)      | 352 | 6.82 (3.65)     | 354 |
| Number of first visits (n=1058)                             | 1 (-)                     | 352 | 1 (-)            | 352 | 1 (-)           | 354 |
| Number of follow-up visits ( <u>n = 1006</u> ) <sup>1</sup> | 6.96 (4.06)               | 338 | 6.73 (3.89)      | 333 | 6.15 (3.47)     | 335 |
| <b>Length of visits (mins)</b>                              |                           |     |                  |     |                 |     |
| Length of visits (mins) (all)                               | 21.76 (6.91)              | 352 | 21.24 (7.18)     | 352 | 20.11 (6.65)    | 354 |
| Length of first visit (mins)                                | 28.80 (11.93)             | 347 | 28.14 (11.14)    | 350 | 25.56 (10.20)   | 354 |
| Length of follow-up visit (mins)                            | 20.54 (6.99) <sup>2</sup> | 338 | 19.38 (6.90)     | 333 | 18.64 (6.85)    | 335 |
| <b>Prevention</b>                                           |                           |     |                  |     |                 |     |
| Prevention                                                  | 0.79 (0.22)               | 352 | 0.79 (0.22)      | 352 | 0.85 (0.19)     | 354 |
| Prevention at first visit                                   | 0.81 (0.39) <sup>3</sup>  | 350 | 0.83 (0.37)      | 351 | 0.91 (0.29)     | 353 |
| Prevention at follow-up visits                              | 0.79 (0.23) <sup>4</sup>  | 338 | 0.78 (0.23)      | 333 | 0.85 (0.21)     | 335 |

<sup>1</sup> Participants only had 1 visit (n=52). Please note that all average totals reported for follow-up visits are slightly underestimated it assumes missing values are equivalent to 0. Imputations for missing values are accounted for in *Appendix 6, Section 5 – Table 73*

<sup>2</sup> Interpretation: On average, each follow-up visit was 20 ½ minutes in duration

<sup>3</sup> Interpretation: On average, 81% of children randomized to C+P had prevention at their first visit

<sup>4</sup> Interpretation: On average, each child randomized to C+P had prevention at 79% of their follow-up visits

| Resource Use (per visit)                                                                | C+P<br>Mean (sd)         | n   | B+P<br>Mean (sd) | n   | PA<br>Mean (sd) | n   |
|-----------------------------------------------------------------------------------------|--------------------------|-----|------------------|-----|-----------------|-----|
| <b><i>Prevention staff</i></b>                                                          |                          |     |                  |     |                 |     |
| GDP providing prevention at first visit                                                 | 0.71(0.46) <sup>1</sup>  | 349 | 0.72 (0.45)      | 349 | 0.77 (0.42)     | 344 |
| Dental therapist providing prevention at first visit                                    | 0.07 (0.25)              | 349 | 0.07 (0.25)      | 349 | 0.08 (0.26)     | 344 |
| Dental hygienist providing prevention at first visit                                    | 0.02 (0.13)              | 349 | 0.02 (0.14)      | 349 | 0.03 (0.17)     | 344 |
| Oral Health Educator providing prevention at first visit                                | 0.01 (0.11)              | 349 | 0.02 (0.15)      | 349 | 0.04 (0.19)     | 344 |
| Childsmile <sup>2</sup> /Extended Duty Dental Nurse providing prevention at first visit | 0.03 (0.16)              | 349 | 0.02 (0.13)      | 349 | 0.03 (0.16)     | 344 |
| Other staff (dental nurse) providing prevention at first visit                          | 0.01 (0.11)              | 350 | 0.01 (0.09)      | 351 | 0.01 (0.12)     | 353 |
| Other staff (dental nurse trainee) providing prevention at first visit                  | 0 (-)                    | 350 | 0 (-)            | 351 | 0 (-)           | 353 |
| Other staff member (CT1) providing prevention at first visit                            | 0 (-)                    | 350 | 0 (-)            | 351 | 0 (-)           | 353 |
| Other staff member (dental student) providing prevention at first visit                 | 0 (-)                    | 350 | 0 (-)            | 351 | 0 (-)           | 353 |
| GDP providing prevention at follow-up visits                                            | 0.69 (0.27) <sup>3</sup> | 338 | 0.68 (0.27)      | 333 | 0.76 (0.26)     | 335 |
| Dental therapist providing prevention at follow-up visits                               | 0.07 (0.14)              | 338 | 0.06 (0.13)      | 333 | 0.05 (0.12)     | 335 |

<sup>1</sup> Interpretation: On average, 71% of children randomized to C+P had prevention provided by a GDP at their first visit

<sup>2</sup> Childsmile is a national program designed to improve the oral health of children in Scotland and reduce inequalities both in dental health and access to dental services. <http://www.child-smile.org.uk/professionals/about-childsmile.aspx>

<sup>3</sup> Interpretation: On average, each child randomized to C+P had had prevention provided by a GDP at 69% of their follow-up visits

| <b>Resource Use (per visit)</b>                                                    | <b>C+P<br/>Mean (sd)</b> | <b>n</b> | <b>B+P<br/>Mean (sd)</b> | <b>n</b> | <b>PA<br/>Mean (sd)</b> | <b>n</b> |
|------------------------------------------------------------------------------------|--------------------------|----------|--------------------------|----------|-------------------------|----------|
| Oral health educator providing prevention at follow-up visits                      | 0.01 (0.07)              | 338      | 0.01 (0.06)              | 333      | 0.01 (0.05)             | 335      |
| Childsmile/Extended Duty Dental Nurse providing prevention at follow-up visits     | 0.02 (0.08)              | 338      | 0.01 (0.04)              | 333      | 0.02 (0.06)             | 335      |
| Other staff member (dental nurse) providing prevention at follow-up visits         | 0.03 (0.15)              | 338      | 0.02 (0.13)              | 333      | 0.03 (0.15)             | 335      |
| Other staff member (dental nurse trainee) providing prevention at follow-up visits | 0 (-)                    | 338      | 0 (-)                    | 333      | <0.01 (0.01)            | 335      |
| Other staff member (CT1) providing prevention at follow-up visits                  | 0 (-)                    | 338      | <0.01 (<0.01)            | 333      | 0 (-)                   | 335      |
| Other staff member (dental student) providing prevention at follow-up visits       | <0.01 (0.01)             | 338      | <0.01 (0.01)             | 333      | <0.01 (0.01)            | 335      |
| <b><i>Prevention (components)</i></b>                                              |                          |          |                          |          |                         |          |
| Brushing/Plaque Control advice provided at first visit                             | 0.76 (0.43) <sup>1</sup> | 350      | 0.79 (0.41)              | 351      | 0.88 (0.32)             | 353      |
| Fissure Sealants provided at first visit                                           | 0.12 (0.33)              | 350      | 0.15 (0.35)              | 351      | 0.15 (0.36)             | 353      |
| Fluoride Varnish provided at first visit                                           | 0.53 (0.50)              | 350      | 0.56 (0.50)              | 351      | 0.74 (0.44)             | 353      |
| Diet Investigation/Advice provided at first visit                                  | 0.70 (0.46)              | 350      | 0.75 (0.43)              | 351      | 0.84 (0.37)             | 353      |
| Brushing/Plaque Control advice provided at follow-up visits                        | 0.73 (0.26) <sup>2</sup> | 338      | 0.71 (0.26)              | 333      | 0.78 (0.24)             | 335      |

<sup>1</sup> Interpretation: On average, 76% of children randomized to C+P had the prevention pillar “Brushing/Plaque control advice” provided at their first visit.

<sup>2</sup> Interpretation: On average, each child randomized to C+P had the prevention pillar “Brushing/Plaque control advice” at 73% of their follow-up visits

| <b>Resource Use (per visit)</b>                                         | <b>C+P<br/>Mean (sd)</b>   | <b>n</b> | <b>B+P<br/>Mean (sd)</b> | <b>n</b> | <b>PA<br/>Mean (sd)</b> | <b>n</b> |
|-------------------------------------------------------------------------|----------------------------|----------|--------------------------|----------|-------------------------|----------|
| Fissure Sealants provided at follow-up visits                           | 0.13 (0.20)                | 338      | 0.15 (0.22)              | 333      | 0.16 (0.23)             | 335      |
| Fluoride Varnish provided at follow-up visits                           | 0.51 (0.31)                | 338      | 0.54 (0.31)              | 333      | 0.62 (0.31)             | 335      |
| Diet Investigation/Advice provided at follow-up visits                  | 0.66 (0.29)                | 338      | 0.64 (0.30)              | 333      | 0.71 (0.29)             | 335      |
| <b><i>Prevention time</i></b>                                           |                            |          |                          |          |                         |          |
| Length of time providing prevention at first visit (mins)               | 10.18 (10.44) <sup>1</sup> | 331      | 10.08 (8.75)             | 335      | 12.82 (8.03)            | 336      |
| Length of time providing prevention at follow-up visits (mins)          | 6.58 (4.21) <sup>2</sup>   | 338      | 6.40 (3.96)              | 333      | 7.58 (4.16)             | 335      |
| <b><i>Operative Treatment</i></b>                                       |                            |          |                          |          |                         |          |
| Operative treatment at first visit                                      | 0.62 (0.49) <sup>3</sup>   | 349      | 0.63 (0.48)              | 351      | 0.16 (0.37)             | 353      |
| Operative treatment at follow-up visits                                 | 0.36 (0.28) <sup>4</sup>   | 338      | 0.34 (0.26)              | 333      | 0.19 (0.24)             | 335      |
| <b><i>Operative treatment time</i></b>                                  |                            |          |                          |          |                         |          |
| Length of time providing operative treatment at first visit (mins)      | 18.31 (11.21)              | 336      | 17.94 (11.27)            | 337      | 12.42 (10.48)           | 350      |
| Length of time providing operative treatment at follow-up visits (mins) | 12.86 (7.08)               | 338      | 12.08 (6.47)             | 333      | 10.16 (6.55)            | 335      |

<sup>1</sup> Interpretation: On average, each child randomized to C+P had 10 minutes of prevention at their first visit

<sup>2</sup> Interpretation: On average, each child randomized to C+P received 6 and a half minutes of prevention at each follow-up visit

<sup>3</sup> Interpretation: On average, 62% of children randomized to C+P had operative treatment at their first visit

<sup>4</sup> Interpretation: On average, each child randomized to C+P had operative treatment at 36% of their follow-up visits

| Resource Use (per visit)                                                       | C+P<br>Mean (sd)         | n   | B+P<br>Mean (sd) | n   | PA<br>Mean (sd) | n   |
|--------------------------------------------------------------------------------|--------------------------|-----|------------------|-----|-----------------|-----|
| <b><i>Operative treatment staff</i></b>                                        |                          |     |                  |     |                 |     |
| Dental therapist providing operative treatment at first visit                  | 0.04 (0.18)              | 342 | 0.03 (0.18)      | 343 | 0.02 (0.15)     | 349 |
| GDP providing operative treatment at first visit                               | 0.58 (0.49) <sup>1</sup> | 342 | 0.60 (0.49)      | 343 | 0.14 (0.34)     | 349 |
| Dental therapist providing operative treatment at follow-up visits             | 0.03 (0.09)              | 338 | 0.03 (0.08)      | 333 | 0.01 (0.04)     | 335 |
| GDP providing operative treatment at follow-up visits                          | 0.32 (0.29) <sup>2</sup> | 338 | 0.29 (0.25)      | 333 | 0.17 (0.23)     | 335 |
| <b><i>Primary Teeth Treated</i></b>                                            |                          |     |                  |     |                 |     |
| Number of primary teeth treated operatively at first visit                     | 0.98 (1.12) <sup>3</sup> | 349 | 1.16 (1.32)      | 351 | 0.26 (0.70)     | 353 |
| Number of surfaces treated at first visit                                      | 0.98 (1.05)              | 349 | 1.29 (1.50)      | 351 | 0.28 (0.80)     | 353 |
| Number of primary teeth treated operatively at follow-up visits                | 0.55 (0.59) <sup>4</sup> | 338 | 0.50 (0.46)      | 333 | 0.29 (0.48)     | 335 |
| Number of surfaces at follow-up visits                                         | 0.67 (0.71)              | 338 | 0.74 (0.77)      | 333 | 0.35 (0.53)     | 335 |
| <b><i>Operative Treatment - Caries Removal</i></b>                             |                          |     |                  |     |                 |     |
| Average total complete caries removal per treated primary tooth at first visit | 0.46 (0.49) <sup>5</sup> | 349 | 0.06 (0.22)      | 351 | 0.04 (0.19)     | 353 |

<sup>1</sup> Interpretation: On average, 58% of children randomized to C+P had operative treatment provided by a GDP at their first visit

<sup>2</sup> Interpretation: On average, each child randomized to C+P had operative treatment provided by a GDP at 32% of their follow-up visits

<sup>3</sup> Interpretation: On average, each child randomized to C+P had 0.98 teeth treated operatively at their first visit

<sup>4</sup> Interpretation: On average, each child randomized to C+P had half a primary tooth treated operatively at each follow-up visit (or 1 primary tooth treated operatively for every 2 follow-up visits)

<sup>5</sup> Interpretation: On average, each child randomized to C+P had complete caries removal on 46% of their operatively treated primary teeth at a first visit

| Resource Use (per visit)                                                            | C+P<br>Mean (sd)         | n   | B+P<br>Mean (sd) | n   | PA<br>Mean (sd) | n   |
|-------------------------------------------------------------------------------------|--------------------------|-----|------------------|-----|-----------------|-----|
| Average total partial caries removal per treated primary tooth at first visit       | 0.08 (0.25)              | 349 | 0.31 (0.44)      | 351 | 0.05 (0.21)     | 353 |
| Average total 'None' caries removal per treated primary tooth at first visit        | 0.06 (0.24)              | 349 | 0.24 (0.41)      | 351 | 0.05 (0.21)     | 353 |
| Average total complete caries removal per treated primary tooth at follow-up visits | 0.21 (0.23) <sup>1</sup> | 338 | 0.05 (0.12)      | 333 | 0.06 (0.16)     | 335 |
| Average total partial caries removal per treated primary tooth at follow-up visits  | 0.05 (0.11)              | 338 | 0.11 (0.16)      | 333 | 0.04 (0.11)     | 335 |
| Average total 'None' caries removal per treated primary tooth at follow-up visits   | 0.06 (0.13)              | 338 | 0.12 (0.18)      | 333 | 0.05 (0.11)     | 335 |
| <b>Restorations</b>                                                                 |                          |     |                  |     |                 |     |
| Restorations at first visit                                                         | 0.58 (0.49) <sup>2</sup> | 352 | 0.59 (0.49)      | 352 | 0.10 (0.30)     | 354 |
| Average total amalgam restorations per treated primary tooth at first visit         | 0.08 (0.26) <sup>3</sup> | 349 | 0.01 (0.11)      | 351 | 0.01 (0.08)     | 353 |
| Average total glass ionomer restorations per treated primary tooth at first visit   | 0.13 (0.33)              | 349 | 0.15 (0.35)      | 351 | 0.05 (0.21)     | 353 |

<sup>1</sup> Interpretation: On average, each child randomized to C+P had complete caries removal on 21% of their operatively treated primary teeth at each follow-up visit

<sup>2</sup> Interpretation: On average, 58% of children randomized to C+P had restorative treatment on an operatively treated primary tooth at their first visit

<sup>3</sup> Interpretation: On average, each child randomized to C+P had an amalgam restoration on 8% of their operatively treated primary teeth at their first visit



| <b>Resource Use (per visit)</b>                                                                          | <b>C+P<br/>Mean (sd)</b> | <b>n</b> | <b>B+P<br/>Mean (sd)</b> | <b>n</b> | <b>PA<br/>Mean (sd)</b> | <b>n</b> |
|----------------------------------------------------------------------------------------------------------|--------------------------|----------|--------------------------|----------|-------------------------|----------|
| Average total conventional preformed metal crown restorations per treated primary tooth at first visit   | 0.01 (0.10)              | 349      | <0.01 (0.05)             | 351      | 0 (-)                   | 353      |
| Average total composite restorations per treated primary tooth at first visit                            | 0.17 (0.37)              | 349      | 0.07 (0.25)              | 351      | 0.01 (0.08)             | 353      |
| Average total Hall Technique preformed metal crown restorations per treated primary tooth at first visit | 0.02 (0.12)              | 349      | 0.12 (0.32)              | 351      | 0.01 (0.10)             | 353      |
| Average total compomer restorations per treated primary tooth at first visit                             | 0.04 (0.19)              | 349      | 0.03 (0.15)              | 351      | 0.01 (0.08)             | 353      |
| Average total resin modified glass ionomer restorations per treated primary tooth at first visit         | 0.13 (0.33)              | 349      | 0.12 (0.32)              | 351      | 0.01 (0.08)             | 353      |
| Average total sealant only restorations per treated primary tooth at first visit                         | 0.02 (0.12)              | 349      | 0.08 (0.26)              | 351      | 0.01 (0.11)             | 353      |
| Average total sealant over restoration per treated primary tooth at first visit                          | 0.01 (0.09)              | 349      | 0.04 (0.18)              | 351      | 0 (-)                   | 353      |
| Average total pulpotomy restorations per treated primary tooth at first visit                            | 0.01 (0.08)              | 349      | <0.01 (0.05)             | 351      | 0 (-)                   | 353      |
| Average total restorations per treated primary tooth at follow-up visits                                 | 0.30 (0.27) <sup>4</sup> | 338      | 0.27 (0.24)              | 333      | 0.12 (0.21)             | 335      |

---

<sup>4</sup> Interpretation: On average, each child randomized to C+P had a restoration on at operatively treated primary tooth at 30% of their follow-up visits

| <b>Resource Use (per visit)</b>                                                                               | <b>C+P<br/>Mean (sd)</b> | <b>n</b> | <b>B+P<br/>Mean (sd)</b> | <b>n</b> | <b>PA<br/>Mean (sd)</b> | <b>n</b> |
|---------------------------------------------------------------------------------------------------------------|--------------------------|----------|--------------------------|----------|-------------------------|----------|
| Average total amalgam restorations per treated primary tooth at follow-up visits                              | 0.03 (0.09) <sup>1</sup> | 338      | <0.01 (0.03)             | 333      | <0.01 (0.04)            | 335      |
| Average total glass ionomer restorations per treated primary tooth at follow-up visits                        | 0.10 (0.19)              | 338      | 0.09 (0.17)              | 333      | 0.06 (0.15)             | 335      |
| Average total composite restorations per treated primary tooth at follow-up visits                            | 0.05 (0.12)              | 338      | 0.03 (0.09)              | 333      | 0.01 (0.08)             | 335      |
| Average total conventional preformed metal crown restorations per treated primary tooth at follow-up visits   | 0.01 (0.05)              | 338      | <0.01 (0.02)             | 333      | <0.01 (0.02)            | 335      |
| Average total Hall Technique preformed metal crown restorations per treated primary tooth at follow-up visits | 0.01 (0.06)              | 338      | 0.07 (0.14)              | 333      | 0.01 (0.07)             | 335      |
| Average total compomer restorations per treated primary tooth at follow-up visits                             | 0.01 (0.06)              | 338      | 0.01 (0.03)              | 333      | <0.01 (0.03)            | 335      |
| Average total resin modified glass ionomer restorations per treated primary tooth at follow-up visits         | 0.07 (0.15)              | 338      | 0.06 (0.15)              | 333      | 0.03 (0.10)             | 335      |
| Average total sealant only restorations per treated primary tooth at follow-up visits                         | 0.01 (0.06)              | 338      | 0.01 (0.05)              | 333      | 0.01 (0.03)             | 335      |
| Average total sealant over restoration per treated primary tooth at follow-up visits                          | <0.01 (0.03)             | 338      | 0.01 (0.05)              | 333      | <0.01 (0.01)            | 335      |

---

<sup>1</sup> Interpretation: On average, each child randomized to C+P had an amalgam restoration on 3% of their operatively treated primary teeth at each follow-up visit

| Resource Use (per visit)                                                                    | C+P<br>Mean (sd)         | n   | B+P<br>Mean (sd) | n   | PA<br>Mean (sd) | n   |
|---------------------------------------------------------------------------------------------|--------------------------|-----|------------------|-----|-----------------|-----|
| Average total pulpotomy restorations per treated primary tooth at follow-up visits          | 0.01 (0.04)              | 338 | 0.01 (0.06)      | 333 | 0.01 (0.04)     | 335 |
| <b>Local anaesthetic (LA)</b>                                                               |                          |     |                  |     |                 |     |
| Average total LAs attempted per treated primary tooth at first visit                        | 0.26 (0.43) <sup>1</sup> | 349 | 0.02 (0.12)      | 351 | 0.02 (0.11)     | 353 |
| Average total LAs achieved per treated primary tooth at first visit (successful)            | 0.22 (0.41) <sup>2</sup> | 349 | 0.01 (0.10)      | 351 | 0.01 (0.11)     | 353 |
| Average total LAs not achieved per treated primary tooth at first visit (unsuccessful)      | 0.03 (0.17)              | 349 | <0.01 (0.06)     | 351 | <0.01 (0.03)    | 353 |
| Average total LAs not attempted per treated primary tooth at first visit                    | 0.22 (0.41)              | 349 | 0.37 (0.48)      | 351 | 0.05 (0.22)     | 353 |
| Average total LAs attempted per treated primary tooth at follow-up visits                   | 0.13 (0.19) <sup>3</sup> | 338 | 0.05 (0.10)      | 333 | 0.04 (0.11)     | 335 |
| Average total LAs achieved per treated primary tooth at follow-up visits (successful)       | 0.12 (0.18) <sup>4</sup> | 338 | 0.04 (0.10)      | 333 | 0.04 (0.10)     | 335 |
| Average total LAs not achieved per treated primary tooth at follow-up visits (unsuccessful) | 0.01 (0.07)              | 338 | <0.01 (0.03)     | 333 | <0.01 (0.02)    | 335 |

<sup>1</sup> Interpretation: On average, each child randomized to C+P had LA attempted on 26% of their operatively treated primary teeth at their first visit

<sup>2</sup> Interpretation: On average, each child randomized to C+P had successful LA attempted on 22% of their operatively treated primary teeth at their first visit

<sup>3</sup> Interpretation: On average, each child randomized to C+P had LA attempted on 13% of their operatively treated primary teeth at each follow-up visit

<sup>4</sup> Interpretation: On average, each child randomized to C+P had a successful local anaesthetic attempted on 12% of their operatively treated primary teeth at each follow-up visit

| <b>Resource Use (per visit)</b>                                               | <b>C+P<br/>Mean (sd)</b> | <b>n</b> | <b>B+P<br/>Mean (sd)</b> | <b>n</b> | <b>PA<br/>Mean (sd)</b> | <b>n</b> |
|-------------------------------------------------------------------------------|--------------------------|----------|--------------------------|----------|-------------------------|----------|
| Average total LAs not attempted per treated primary tooth at follow-up visits | 0.15 (0.21)              | 338      | 0.18 (0.21)              | 333      | 0.07 (0.15)             | 335      |
| <b>Other Procedures</b>                                                       |                          |          |                          |          |                         |          |
| Average total extractions per treated primary tooth at first visit            | 0.01 (0.09) <sup>1</sup> | 349      | 0.01 (0.08)              | 351      | 0.01 (0.10)             | 353      |
| Average total lesions opened per treated primary tooth at first visit         | 0.01 (0.08)              | 349      | 0.02 (0.12)              | 351      | 0.04 (0.19)             | 353      |
| Average total extractions per treated primary tooth at follow-up visits       | 0.04 (0.11) <sup>2</sup> | 338      | 0.04 (0.10)              | 333      | 0.04 (0.11)             | 335      |
| Average total lesions opened per treated primary tooth at follow-up visits    | 0.01 (0.03)              | 338      | 0.01 (0.03)              | 333      | 0.02 (0.08)             | 335      |
| <b>Radiographs</b>                                                            |                          |          |                          |          |                         |          |
| Radiographs at first visit                                                    | 0.18 (0.39) <sup>3</sup> | 350      | 0.18 (0.38)              | 351      | 0.19 (0.39)             | 353      |
| Radiographs at follow-up visits                                               | 0.10 (0.15) <sup>4</sup> | 338      | 0.08 (0.14)              | 333      | 0.11 (0.17)             | 335      |
| <b>Inhalation Sedation/Relative Analgesia</b>                                 |                          |          |                          |          |                         |          |
| Inhalation sedation/relative analgesia at first visit                         | 0.01 (0.08)              | 345      | 0 (-)                    | 347      | <0.01 (0.05)            | 348      |
| Inhalation sedation/relative analgesia at follow-up visits                    | 0.01 (0.07)              | 338      | 0.01 (0.04)              | 333      | 0.01(0.03)              | 335      |

<sup>1</sup> Interpretation: On average, each child randomized to C+P had 1% of their operatively treated primary teeth extracted at their first visit

<sup>2</sup> Interpretation: On average, each child randomized to C+P had 4% of their operatively treated primary teeth extracted at each follow-up visit

<sup>3</sup> Interpretation: On average, 18% of children randomized to C+P had a radiograph taken at their first visit

<sup>4</sup> Interpretation: On average, each child randomized to C+P had a radiograph taken at 10% of their follow-up visits

| Resource Use (per visit)                   | C+P<br>Mean (sd)          | n   | B+P<br>Mean (sd) | n   | PA<br>Mean (sd) | n   |
|--------------------------------------------|---------------------------|-----|------------------|-----|-----------------|-----|
| <b>Painkillers</b>                         |                           |     |                  |     |                 |     |
| Painkillers prescribed at first visit      | 0 (-) <sup>1</sup>        | 344 | 0 (-)            | 346 | 0 (-)           | 349 |
| Paracetamol prescribed at first visit      | 0 (-)                     | 352 | 0 (-)            | 352 | 0 (-)           | 354 |
| Ibuprofen prescribed at first visit        | 0 (-)                     | 352 | 0 (-)            | 352 | 0 (-)           | 354 |
| Painkillers prescribed at follow-up visits | <0.01 (0.03) <sup>2</sup> | 338 | <0.01 (0.03)     | 333 | <0.01 (0.01)    | 335 |
| Paracetamol prescribed at follow-up visits | <0.01 (0.01)              | 338 | <0.01 (0.02)     | 333 | <0.01 (0.01)    | 335 |
| Ibuprofen prescribed at follow-up visits   | <0.01 (0.02)              | 338 | <0.01 (0.02)     | 333 | <0.01 (0.01)    | 335 |

---

<sup>1</sup> Interpretation: On average, no children randomized to C+P were prescribed any painkillers at their first visit

<sup>2</sup> Interpretation: On average, each child randomized to C+P were prescribed painkillers at less than 1% of their follow-up visits

**Appendix Table 3: Reasons for ‘major’ deviation from the randomized treatment arm’s operative treatment protocol (n=429)**

| Reason for ‘major’ deviation                    | C+P                       | B+P       | PA        | Total      |
|-------------------------------------------------|---------------------------|-----------|-----------|------------|
|                                                 | n= 195                    | n= 65     | n=169     | n=429      |
|                                                 | Number (% of non-missing) |           |           |            |
| <b>Total (non-missing)</b>                      | 188                       | 65        | 164       | 417        |
| <i>Parent factors</i>                           | 33 (17.6)                 | 29 (44.6) | 55 (33.5) | 117 (28.1) |
| <i>Child pre-cooperative for LA</i>             | 82 (43.6)                 | 3 (4.6)   | 1 (0.6)   | 86 (20.6)  |
| <i>Dentist’s clinical judgement</i>             | 23 (12.2)                 | 19 (29.2) | 78 (47.6) | 120 (28.8) |
| <i>Child anxiety</i>                            | 41 (21.8)                 | 6 (9.2)   | 0 (0.0)   | 47 (11.3)  |
| <i>Food packing</i>                             | 0 (0.0)                   | 1 (1.5)   | 16 (9.8)  | 17 (4.1)   |
| <i>Child Factors (not anxiety/ cooperation)</i> | 5 (2.7)                   | 5 (7.7)   | 6 (3.7)   | 16 (3.8)   |
| <i>Other</i>                                    | 4 (2.1)                   | 2 (3.1)   | 8 (4.9)   | 14 (3.4)   |

**Appendix Table 4: Direction of ‘major’ deviations only (n=429 ‘major’ deviations)**

| Arm randomized to | Arm(s) treatment deviated to <sup>1</sup> | Number of ‘major’ deviations by arm (n=429) | Randomized arm deviated from – group total (%) |
|-------------------|-------------------------------------------|---------------------------------------------|------------------------------------------------|
| C+P               | B+P                                       | 135 (69.2)                                  | 195 (45.5)                                     |
|                   | PA <sup>3</sup>                           | 52 (26.7)                                   |                                                |
|                   | B+P and PA <sup>2</sup>                   | 3 (1.5)                                     |                                                |
|                   | C+P and B+P <sup>2</sup>                  | 3 (1.5)                                     |                                                |
|                   | C+P and PA <sup>2</sup>                   | 2 (1.0)                                     |                                                |
| B+P               | C+P                                       | 52 (80.0)                                   | 65 (15.2)                                      |
|                   | PA <sup>2</sup>                           | 10 (15.4)                                   |                                                |
|                   | C+P and B+P <sup>2</sup>                  | 1 (1.5)                                     |                                                |
|                   | C+P, B+P and PA <sup>2,3</sup>            | 1 (1.5)                                     |                                                |
|                   | C+P and PA <sup>2,3</sup>                 | 1 (1.5)                                     |                                                |
| PA                | C+P                                       | 90 (53.3)                                   | 169 (39.4)                                     |
|                   | B+P                                       | 71 (42.0)                                   |                                                |
|                   | B+P and PA <sup>2,3</sup>                 | 4 (2.4)                                     |                                                |
|                   | C+P and PA <sup>2</sup>                   | 3 (1.8)                                     |                                                |
|                   | C+P and B+P <sup>2</sup>                  | 1 (0.6)                                     |                                                |

<sup>1</sup>Any treatment provided by a FiCTION clinician that moved the participant’s treatment away from their randomized treatment arm was designated a ‘major’ treatment deviation and required completion of a TDF by the treating clinician (e.g. ‘Prevention’ to ‘Biological’).

<sup>2</sup> With instances in which a deviation was necessary to deliver treatment, the deviation could be towards more than one arm in a single visit (e.g. ‘Prevention’ to ‘Biological’ **and** ‘Conventional’).

<sup>3</sup> Best practice prevention was an integral part of each treatment arm. A ‘major’ treatment deviation to the ‘Prevention’ arm was true only if a clinician had attempted to deliver treatment to a participant by their designated ‘Biological’ or ‘Conventional’ arm, but had been unable to achieve completion of that treatment before moving towards prevention alone as contingency.

**Appendix Table 5. Summary statistics for Incidence and Number of episodes of dental pain and/or dental infection restricted to participants with at least 23 months follow up (n=797)**

| <b>Outcome</b>                                                   | <b>C+P<br/>n=269</b> | <b>B+P<br/>n=267</b> | <b>PA<br/>n=261</b> | <b>Total<br/>n=797</b>  |
|------------------------------------------------------------------|----------------------|----------------------|---------------------|-------------------------|
| <b>Incidence of dental pain and/or dental infection</b>          |                      |                      |                     |                         |
| Dental pain ever <sup>1</sup> (%)                                | 102 (37.9)           | 97 (36.3)            | 116 (44.4)          | 315 (39.5)              |
| Dental infection ever <sup>1</sup> (%)                           | 73 (27.1)            | 74 (27.7)            | 76 (29.1)           | 223 (28.0)              |
| Dental pain and/or dental infection ever <sup>1</sup> (%)        | 121 (45.0)           | 122 (45.7)           | 130 (49.8)          | 374 (46.9) <sup>2</sup> |
| <b>Number of episodes of dental pain and/or dental infection</b> |                      |                      |                     |                         |
| Min                                                              | 0                    | 0                    | 0                   | 0                       |
| Median (IQR)                                                     | 0 (0,1)              | 0 (0,1)              | 1 (0,1)             | 0 (0,1)                 |
| Mean (sd)                                                        | 0.66 (0.97)          | 0.67 (0.92)          | 0.84 (1.06)         | 0.72 (0.99)             |
| Max                                                              | 7                    | 6                    | 5                   | 7                       |
| <b>Number (%)</b>                                                |                      |                      |                     |                         |
| 0                                                                | 148 (55.0)           | 145 (54.3)           | 130 (49.8)          | 423 (53.1)              |
| 1                                                                | 88 (32.7)            | 85 (31.8)            | 74 (28.4)           | 247 (31.0)              |
| 2                                                                | 18 (6.7)             | 22 (8.2)             | 36 (13.8)           | 76 (9.5)                |
| 3                                                                | 12 (4.5)             | 13 (4.9)             | 14 (5.4)            | 39 (4.9)                |
| 4                                                                | 1 (0.4)              | 1 (0.4)              | 5 (1.9)             | 7 (0.9)                 |
| 5                                                                | 0 (0.0)              | 0 (0.0)              | 2 (0.8)             | 2 (0.3)                 |
| 6                                                                | 1 (0.4)              | 1 (0.4)              | 0 (0.0)             | 2 (0.3)                 |
| 7                                                                | 1 (0.4)              | 0 (0.0)              | 0 (0.0)             | 1 (0.1)                 |

<sup>1</sup> During the follow-up period of the trial

<sup>2</sup> When participants with less than 23 months follow-up are excluded, the overall incidence of dental pain and/or dental sepsis increases from 42.5% to 46.9% due to a lower proportion of participants with less than 23 months follow-up having experienced dental pain and/or sepsis. 75/261 (28.7%) of the participants excluded from this analysis set were in the study for less than six months.



**Appendix Table 6. Summary statistics for Incidence and Number of episodes of dental pain and/or dental infection (PP analysis set, n=940)**

| <b>Outcome</b>                                                   | <b>C+P<br/>n=311</b> | <b>B+P<br/>n=329</b> | <b>PA<br/>n=300</b> | <b>Total<br/>n=940</b> |
|------------------------------------------------------------------|----------------------|----------------------|---------------------|------------------------|
| <b>Incidence of dental pain and/or dental infection</b>          |                      |                      |                     |                        |
| Dental pain ever <sup>1</sup> (%)                                | 106 (34.1)           | 103 (31.3)           | 109 (36.3)          | 318 (33.8)             |
| Dental infection ever <sup>1</sup> (%)                           | 77 (24.8)            | 78 (23.7)            | 76 (25.3)           | 231 (24.6)             |
| Dental pain and/or dental infection ever <sup>1</sup> (%)        | 124 (39.9)           | 127 (38.6)           | 126 (42.0)          | 377 (40.1)             |
| <b>Number of episodes of dental pain and/or dental infection</b> |                      |                      |                     |                        |
| Min                                                              | 0                    | 0                    | 0                   | 0                      |
| Median (IQR)                                                     | 0 (0,1)              | 0 (0,1)              | 0 (0,1)             | 0 (0,1)                |
| Mean (sd)                                                        | 0.57 (0.89)          | 0.57 (0.87)          | 0.66 (0.94)         | 0.59 (0.90)            |
| Max                                                              | 7                    | 6                    | 5                   | 7                      |
| <b>Number (%)</b>                                                |                      |                      |                     |                        |
| 0                                                                | 187 (60.1)           | 202 (61.4)           | 174 (58.0)          | 563 (59.9)             |
| 1                                                                | 92 (29.6)            | 87 (26.4)            | 76 (25.3)           | 255 (27.1)             |
| 2                                                                | 18 (5.8)             | 25 (7.6)             | 34 (11.3)           | 77 (8.2)               |
| 3                                                                | 11 (3.5)             | 13 (4.0)             | 12 (4.0)            | 36 (3.8)               |
| 4                                                                | 2 (0.6)              | 1 (0.3)              | 3 (1.0)             | 6 (0.6)                |
| 5                                                                | 0 (0.0)              | 0 (0.0)              | 1 (0.3)             | 1 (0.1)                |
| 6                                                                | 0 (0.0)              | 1 (0.3)              | 0 (0.0)             | 1 (0.1)                |
| 7                                                                | 1 (0.3)              | 0 (0.0)              | 0 (0.0)             | 1 (0.1)                |

---

<sup>1</sup> During the follow-up period of the trial

**Appendix Table 7: Descriptive statistics by dental pain and/or infection ever (yes/no), [MITT analysis set]**

|                                                                     | Dental pain and/or infection ever |                     |     |                     |
|---------------------------------------------------------------------|-----------------------------------|---------------------|-----|---------------------|
| Variable                                                            | n                                 | Yes<br>n=450        | n   | No<br>n=608         |
| Age (years), mean (sd)                                              | 450                               | 5.9 (1.2)           | 607 | 6.0 (1.3)           |
| Ethnicity (white), x(%)                                             | 402                               | 312 (77.6)          | 553 | 415 (75.1)          |
| Fluoride level (ppm) <sup>1</sup>                                   | 450                               |                     | 608 |                     |
| Min                                                                 |                                   | 0.003               |     | 0.003               |
| Median (IQR)                                                        |                                   | 0.093 (0.039,0.181) |     | 0.096 (0.049,0.231) |
| Max                                                                 |                                   | 1.024               |     | 1.024               |
| Index of deprivation (deciles) <sup>1</sup>                         | 450                               |                     | 608 |                     |
| Min                                                                 |                                   | 1                   |     | 1                   |
| Median (IQR)                                                        |                                   | 3 (2,5)             |     | 3 (1,5)             |
| Max                                                                 |                                   | 10                  |     | 10                  |
| Number of decayed teeth at baseline<br>(ICDAS level 5/6 cavitation) | 433                               |                     | 573 |                     |
| Min                                                                 |                                   | 0                   |     | 0                   |
| Median (IQR)                                                        |                                   | 2 (1,3)             |     | 1 (0,2)             |
| Mean (sd)                                                           |                                   | 2.1 (2.1)           |     | 1.2 (1.6)           |
| Max                                                                 |                                   | 14                  |     | 9                   |

---

<sup>1</sup> These variables were measured at the dental practice level

**Appendix Table 8: Exploratory univariate logistic regression models for dental pain and/or infection (each row is a different univariate model).**

| Variable                                                                       | n    | Risk ratio | 97.5% Confidence Interval |       | P value |
|--------------------------------------------------------------------------------|------|------------|---------------------------|-------|---------|
|                                                                                |      |            | Lower                     | Upper |         |
| Age (years)                                                                    | 1057 | 0.99       | 0.92                      | 1.06  | 0.6     |
| Ethnicity (White)                                                              | 955  | 1.08       | 0.85                      | 1.37  | 0.6     |
| Water fluoridation (ppm) <sup>1</sup>                                          | 1058 | 0.75       | 0.49                      | 1.15  | 0.4     |
| Index of deprivation (deciles) <sup>1</sup>                                    | 1058 | 1.03       | 0.98                      | 1.07  | 0.3     |
| Number of decayed teeth at baseline from ICDAS charting [level 5/6 cavitation] | 1006 | 1.12       | 1.09                      | 1.16  | <0.001  |

---

<sup>1</sup> These variables were measured at the dental practice level

**Appendix Table 9: Exploratory multivariable model adjusted for age, time in study, number of decayed teeth at baseline, ethnicity, index of deprivation and water fluoridation (n=922)**

| Variable   | Risk difference | Lower 97.5% Confidence Interval | Upper 97.5% Confidence Interval | P value |
|------------|-----------------|---------------------------------|---------------------------------|---------|
| <b>Arm</b> |                 |                                 |                                 |         |
| <b>C+P</b> | 0.00            |                                 |                                 |         |
| <b>B+P</b> | -0.0006         | -0.08                           | 0.08                            | >0.9    |
| <b>PA</b>  | 0.07            | -0.01                           | 0.16                            | 0.06    |

**Appendix Table 10: Time to first dental pain and/or dental sepsis modelled using a Cox proportional hazards model adjusted for age [n=1057].**

| <b>Outcome:<br/>Time to first<br/>dental pain</b> | <b>Hazard Ratio</b> | <b>Lower 97.5%<br/>Confidence interval</b> | <b>Upper 97.5%<br/>Confidence interval</b> | <b>P value</b> |
|---------------------------------------------------|---------------------|--------------------------------------------|--------------------------------------------|----------------|
| <b>Arm</b>                                        |                     |                                            |                                            |                |
| <b>C+P</b>                                        | 1.00                |                                            |                                            |                |
| <b>B+P</b>                                        | 0.95                | 0.73                                       | 1.24                                       | 0.7            |
| <b>PA</b>                                         | 1.19                | 0.92                                       | 1.53                                       | 0.1            |

## **FiCTION Trial recruitment sites and non-author contributors**

### **Recruitment sites**

We are grateful to the child participants, their parents and the GDPs and their clinical and administrative teams who supported the study, giving so generously of their time and also sharing their experiences with us. The practices are listed below;

Alderman Road Dental Practice, Amble Dental Practice, Anita Belbin Dental Surgery, Archway, Ash Dental, Atlas Road Dental Surgery, B Davidoff Dental Surgery, Barnhill Dental Practice, BG Easton, Bridge of Don Dental Practice, Bridge Street Dental Care, Broxden Dental Centre, Brundholme Dental Practice, Burnett Dental Group, Church Road Dental Practice, Colchester Dental Surgery, DCO Dental, Dean Road Dental Practice, Dental Care Perth, Devonshire, E2 Dental Practice, Eastside Dental Practice, Eston Dental Practice, Family Dental Care, Family Dental Practice, Forth Valley Smile Design, Framwellgate Dental Surgery, Hafren House, Hampden Dental Care, High Green, Hillcrest Dental Practice, Horizon (Blyth) Dental Clinic; Horizon (Whitley Bay) Dental Clinic; Jedburgh Dental Clinic; JEM, Kilbirnie Dental Centre, Kings Cross Health and Community Care Centre, Kingsmeadows Dental Practice, Kingsway Dental Practice, Leeds CDS, Llantarnam Dental Practice, Lomond Dental Centre, Louise Hunter & Associates, Montgomery Street Dental Care, Montrose Dental Care, Park View Family Dental (Formerly Mr A I Robson & Associates), Nanodent, Orgreave Dental Surgery, Parkhead Public Dental Service, Pearl Dental, Perfect Smile, Pollock Dental Care, Port Talbot Resource Centre (Dental Teaching Unit), Possilpark Dental Practice, Queensway Dental Clinic, Roseberry Dental Practice, Salmon Lane Dental Care, Shiremoor Dental Practice, Shotley Bridge Dental Care, Springburn Public Dental Service, Springfield Public Dental Service, Stanley Dental Practice, Stoke Newington Dental Practice, Sunderland Road Dental Practice, The Square Dental Practice, The Whitley Bay Dental Clinic, Thompson & Thomas Dental Care, Triangle Dental Practice, Wanstead Village Dental & Health Centre, Westbury Dental Practice, Whickham Dental Practice.

### **Non-author contributors**

We would like to thank a number of people who helped towards the successful completion of the study:

Paul Averley (Collaborator), Jennifer Ball (Project Secretary, NCTU, Former), Hazel Braid (Trial Administrator), Elspeth Barker, (Clinical Lead Secretary, Scotland CC, Former), Paul Blaylock (Research Champion for South Tyneside), Tam Bekele (Research Champion for London CC), Amy Caldwell-Nichols, (Trial Administrator, Former), Ivor Chestnut (Collaborator), Ben Cole (Collaborator, NHS Consultant in Paediatric Dentistry), Michelle Corsi (Clinical Lead Secretary, Wales CC), Kathryn

Cunningham, (Collaborator, Qualitative Clinical Researcher, Former), Mark Deverill (Co-Applicant, Health Economics, Former), Pina Donaldson, (Trial Administrator), Mojtaba Dorri, (Collaborator, Clinical Researcher, Former), Monty Duggal (Co-Applicant), Dafydd Evans (Co-Applicant), Stephen Fayle (Collaborator, NHS Consultant in Paediatric Dentistry), Andrea Henderson-Burton (Clinical Lead Secretary, London CC), Nicola Howe (Collaborator, Database Manager, NCTU, Former), Bev Howell (Clinical Lead Secretary, Wales CC, Former), Alex Keightley (Collaborator, Clinical Researcher, Former), , Marilyn Laird (Senior Trial Administrator, Former) Shahana Lais (Clinical Lead Secretary, London CC, Former), Chris Longbottom, (Collaborator, Trialist, Primary Dental Care) Claire MacDonald (Collaborator, Senior TM, NCTU, Former), William Montelpare (Collaborator, Biostatistician), Valeria Morenio (Collaborator), Shelley O'Rourke (Project Secretary, NCTU, Former), Mark Palmer (Collaborator, TM, NCTU, Former), Julia Phillipson (Clinical Trial Administrator, NCTU), Beverly Philpott (Clinical Lead Secretary, Yorkshire CC), Victoria Pickering (Clinical Lead Secretary, Scotland CC), Nigel Pitts (Co-Applicant), Katherine Rennie (TM, NCTU), Helen Rodd (Collaborator), Chris Speed (Collaborator, Senior TM, NCTU, Former), the late Jimmy Steele (Co-applicant), Vidya Srinivasan (Clinical Lead, Manchester), Nick Steen (Co-Applicant, Statistician, Former), Mathew Stewart (Collaborator, Clinical Researcher, Former) Fiona Szeller (Trial Administrator, Former), Laura Ternent (Collaborator, Health Economist, Former), Lynn Thompson (Project Secretary, NCTU), Sue Thompson (Clinical Lead Secretary, North East England CC), Jared Thornton (Senior TM, NCTU, Former), Elizabeth Treasure (Collaborator), Richard Watt (Collaborator), Richard Welbury (Collaborator).
